# Supplementary material
Source: publisher site journal article supplement (https://kjim.org/upload/media/kjim-2024-041-Supplementary-Table-4.pdf)
Supplement: Supplementary file 1 [file kjim-2024-041-Supplementary-Table-4.pdf]

**Supplementary Table 4. The patient characteristics for early mortality**

| Characteristic                      | Total       | Early mortality | Non early mortality | <i>p</i> value |
|-------------------------------------|-------------|-----------------|---------------------|----------------|
| Total                               | 127 (100.0) | 36 (28.3)       | 91 (71.7)           |                |
| Age (yr)                            | 83 (80–93)  | 83 (80–89)      | 82 (80–93)          | 0.296          |
| Sex, male                           | 63 (49.6)   | 19 (30.2)       | 44 (69.8)           | 0.400          |
| ECOG PS                             |             |                 |                     | 0.112          |
| 0                                   | 2 (1.6)     | 0 (0.0)         | 2 (2.2)             |                |
| 1                                   | 19 (15.0)   | 4 (11.1)        | 15 (16.5)           |                |
| 2                                   | 54 (42.5)   | 11 (30.6)       | 43 (47.3)           |                |
| 3                                   | 36 (28.3)   | 13 (36.1)       | 23 (25.3)           |                |
| 4                                   | 16 (12.6)   | 8 (22.2)        | 8 (8.8)             |                |
| CCI                                 |             |                 |                     | 0.482          |
| ≤ 4                                 | 34 (26.8)   | 9 (25.0)        | 25 (27.5)           |                |
| > 4                                 | 93 (73.2)   | 27 (75.0)       | 66 (72.5)           |                |
| ISS                                 |             |                 |                     | 0.533          |
| I                                   | 10 (7.9)    | 1 (2.8)         | 9 (9.9)             |                |
| II                                  | 27 (21.3)   | 7 (19.4)        | 20 (22.0)           |                |
| III                                 | 84 (66.1)   | 27 (75.0)       | 57 (62.6)           |                |
| R-ISS                               |             |                 |                     | 0.231          |
| I                                   | 5 (3.9)     | 1 (2.8)         | 4 (4.4)             |                |
| II                                  | 45 (35.4)   | 17 (47.2)       | 28 (30.8)           |                |
| III                                 | 47 (37)     | 9 (25.0)        | 38 (41.8)           |                |
| Myeloma type                        |             |                 |                     |                |
| Heavy chain                         |             |                 |                     | 0.786          |
| IgG                                 | 79 (62.2)   | 25 (69.4)       | 54 (59.3)           |                |
| IgA                                 | 27 (21.3)   | 7 (19.4)        | 20 (22.0)           |                |
| IgM                                 | 7 (5.5)     | 2 (5.6)         | 5 (5.5)             |                |
| IgD                                 | 1 (0.8)     | 0 (0.0)         | 1 (1.1)             |                |
| Light chain disease                 | 13 (10.2)   | 2 (5.6)         | 11 (12.1)           |                |
| Light chain                         |             |                 |                     | 0.558          |
| Kappa                               | 71 (55.9)   | 20 (55.6)       | 51 (56.0)           |                |
| Lambda                              | 56 (44.1)   | 16 (44.4)       | 40 (44.0)           |                |
| CRAB criteria                       |             |                 |                     |                |
| Calcium > 11 mg/dL                  | 11 (8.7)    | 7 (19.4)        | 4 (4.4)             | 0.012          |
| Creatinine > 2 mg/dL                | 32 (25.4)   | 14 (40.0)       | 18 (19.8)           | 0.019          |
| Hemoglobin < 10 g/dL                | 95 (74.8)   | 30 (83.3)       | 65 (71.4)           | 0.120          |
| Bone disease                        | 85 (68)     | 23 (67.6)       | 62 (68.1)           | 0.560          |
| Lab                                 |             |                 |                     |                |
| Platelet < 100 × 10 <sup>9</sup> /L | 32 (25.4)   | 12 (34.3)       | 20 (22.0)           | 0.117          |
| Albumin < 3.5g/dL                   | 85 (66.9)   | 28 (77.8)       | 57 (62.6)           | 0.075          |
| LDH elevation                       | 49 (39.5)   | 11 (32.4)       | 38 (42.2)           | 0.214          |
| High-risk cytogenetic abnormalities | 21 (22.3)   | 3 (11.5)        | 18 (72.3)           | 0.097          |
| Chemotherapy                        | 86 (67.7)   | 13 (36.1)       | 73 (80.2)           | < 0.001        |

**Supplementary Table 4. Continued**

| Characteristic             | Total     | Early mortality | Non early mortality | <i>p</i> value |
|----------------------------|-----------|-----------------|---------------------|----------------|
| First chemotherapy regimen |           |                 |                     | 0.414          |
| Bortezomib-based           | 27 (31.4) | 2 (15.4)        | 25 (34.2)           |                |
| Lenalidomide-based         | 17 (19.8) | 3 (23.1)        | 14 (19.2)           |                |
| Alkylating agent-based     | 42 (48.4) | 8 (61.5)        | 34 (46.6)           |                |

Values are presented as number (%) or median (range).

ECOG PS, Eastern Cooperative Oncology Group Performance Status; CCI, Charlson comorbidity index; ISS, International Staging System; R-ISS, Revised International Staging System; Ig, immunoglobulin; LDH, lactate dehydrogenase.
